# Supplementary material for: Ocean Heat Content in the Iberian-Biscay-Ireland regional seas
Source: Copernicus journal article supplement (doi:10.5194/sp-2022-3), 2022-09-23
Supplement: Supplementary file [file sp-2022-3-AC2-supplement.pdf]

**Review of “Ocean Heat Content in the Iberian-Biscay-Ireland regional seas” by Pascual Collar et al (2022) for 7th edition of the Copernicus Marine Service Ocean State Report (OSR 7)**

**Summary**

*This work reports on Ocean Heat Content (OHC) trends over the Iberian-Biscay-Ireland (IBI) region based on Copernicus Marine products. Averaged over the entire region, OHC from 0 to 2000m shows a positive trend of  $0.5 \pm 0.4$  W/m<sup>2</sup>. Regional values display an interesting dipole pattern, with negative trends affecting the offshore ocean north of 38°N, and a positive ‘tongue’ between 31°N and 38°N. The authors then link the OHC trends with the main water masses in the region, revealing how mainly the Mediterranean Outflow Water impacts the region. As OHC is considered an Ocean Monitoring indicator, linking OHC with water masses is a relevant issue, as it brings insights in the mechanisms driving OHC changes. Hence, the preprint is of scientific value and in the scope of the Ocean State Report. However, there is a divergence between the values reported in Figure 1 and the ones reported in the text. Depending on which value is correct, the interpretation of the results can change a lot, and so the conclusions found in the text. With this issue being solved, and the general remarks below being addressed, I believe this would be a good addition to the Report.*

Authors thank the review and the constructive comments. We consider most of the observations proposed by the reviewer contribute to improving the quality of the paper. Therefore, we are open to write a new version of the manuscript including them. Following are summarized some comments about the main issues observed:

Regarding the error found in Figure 1, the authors would like to apologize for it, and we confirm that it is a mistake on figure edition, so discussion and conclusions reported in text are still pertinent.

The reviewer suggestions on the paper structure and its organization will be considered by the authors to improve the readability of the resulting manuscript.

There are some comments recommending extending the information included in the paper. These observations mainly affect the introduction. We consider most of these recommendations are topics that will improve the background of the manuscript. But, considering the size constrictions of the Ocean State Report contributions, these recommendations will be followed including brief additions.

All the reviewer suggestions will be included in the modified manuscript. However, the authors want to state that such new manuscript will have some major changes, some of them following reviewer RC2 recommendations. Such changes will be mainly focused on:

1. Figure 1 will be modified showing trends in the whole time series (period 1993-2020) and in the period 2005-2019. The text will be consequently adapted to discuss these trends.
2. We will modify section 4 showing the regional trends not only for the period 2005-2019 but also for the whole period 1993-2020. The different results computed in these two periods will be discussed in the text.
3. In section 5 we propose to analyse the OHC profiles in two different periods: 1993-2010 and 2010-2018. These two periods are proposed to represent two different behaviours of NAO index (negative trend in the period 1993-2010 and positive trend

in the period 2010-2018). We consider this analysis can reinforce our conclusions highlighting the concordance of results with the hypothesis developed on Leadbetter et al. (2007), Bozec et al. (2011), and Pascual-Collar et al. (2019).

**General comments:**

1. As mentioned in the summary, there is a divergence between the values reported in Figure 1 and the ones reported in the text: Figure 1 reports a trend of  $0.4 \pm 0.3$  of OHC integrated from surface to 150m and of  $0.1 \pm 0.1$  from surface to 700m, while in the text the authors report the  $0.4 \pm 0.3$  being from 0-700m.

The authors apologize for this mistake, the panels in Figure 1 are incorrectly positioned. Please, see reply to Specific Comment 15.

2. Structure: The structure of the report could be improved. There are methodological details in the results that belong in Data & Methods Section, and results in the Conclusion (which will be indicated in the specific comments).

The structure of the contribution will be modified to provide a more organised report. Some observations are given in Specific Comments that we will implement in the text.

See reply to Specific Comments 6,11, 12, 17, 22, and 28.

3. Data & Methods: The methods section could also benefit from explaining how trends were compute (e.g., ordinary least-squares, auto-regressive models, mann-kendall, ...), and by giving some brief details about the data sets used in the analysis. Why were only these 4 datasets used? There are other global products besides GLO-REA, CORA and ARMOR which could have been used (for example, CGLOR and ORAS-5 (GLOBAL\_REANALYSIS\_PHY\_001\_031)), why were these ones selected? It is also important to mention if the same source of temperature and salinity data are included in these products, since you present an ensemble mean in the results. It would also be relevant to mention here that GLO-REA is used as boundary condition for IBI-REA (and the possible implications of this for the ensemble mean).

All this information will be included in the revised manuscript.

4. Discussion: There is a lack of discussion with previous works. For example, in the introduction it is mentioned that previous reports “detected warmings of  $0.9 \pm 0.4$  W/m<sup>2</sup> in the upper 700m in the study region”. The present study reports a trend of  $0.1 \pm 0.1$  (or  $0.4 \pm 0.3$ , depending on which value is correct). The divergence of values should be discussed in the manuscript: how come such smaller trends have been detected now?

The warmings of  $0.9$  Wm<sup>2</sup> were reported in von Schuckmann et al. (2016) and computed over the period 1993-2015. However, the results reported in this work for the period 2015-2020 (20% of data) show weak or even negative anomalies.

The authors agree on the reviewer point, the discussion of divergences with previous editions of OSR is due. Therefore, this information will be included in a future version of the paper.

It worth mentioning that this result is also affected by conclusion of Specific Comment 16.

5. Region map: This is more of a suggestion, but I think the Introduction could benefit from a map showing the IBI region and indicating the main water masses which are discussed in the

text. This would make the text of the introduction read easier, and the interpretation of the results.

Authors understand this suggestion, we will include the description of the work area, however the inclusion of a new figure could collide with the report constraints. Further discussion about this point should be done with the OSR editors.

**Specific comments:**

1. L10: I would change 'model' to 'reanalysis', or say 'model reanalysis' (as in L106).

Suggestion accepted; it will be included in text.

2. The abstract and short summary mention that the work provides an "exhaustive analysis", which made me expect either a lot of data sets included in the analysis, or a lot of results. I think the word "thorough" or another one would be better suited here.

The suggestion is accepted, the text will be modified.

3. L39: Could you add some examples of Ocean Monitoring Indicators?

Suggestion accepted and included in the text. Some other examples of CMEMS OMI's will be mentioned.

4. L42: It is said that the product "GLOBAL\_OMI\_OHC\_trend" will hereafter be referred as GLO-OMI-trend, but in the next sections it is referred mainly as "GLOBAL\_OMI\_OHC\_trend" (for example in paragraph 2 of section 4).

All references to GLOBAL\_OMI\_OHC\_trend will be changed by GLO-OMI-trend.

5. L49: for which period is the trend of  $0.9 \pm 0.4$  W/m<sup>2</sup> from? Can you also add reference to the works that reported such trend?

This trend was computed for the period 1993-2015. Such information will be included in the text. The paragraph will be modified presenting the referenced works next to this sentence.

6. The paragraph about water masses (L60-67) in the study region should come before the paragraph describing how previous studies linked these water masses with OHC (L49-59). This would be a good place to actually introduce the study region.

We will carefully consider this suggestion when drafting the new version of introduction.

7. L68-70: Are these results also for the IBI region? This should be mentioned. And I guess this example belongs to the paragraph from L49-59.

We will carefully consider this suggestion when drafting the new version of introduction.

8. L72: You say MOW does not dominate the changes in the Mediterranean Sea Water... could you mention what does then?

Changes are mainly dominated by year-to-year processes. This paragraph will be rewritten to avoid misunderstandings.

9. L81-83: Here the objective of the work is described. I think should also mention for which periods OHC trends will be analyzed.

Suggestion accepted; this information will be included.

10. L102: You mention "a collection of data sources", do you mean several Copernicus products (such as CORA, Glorys, ...) or several sources of temperature and salinity data (such as Argo floats, CTDs, XBTs, ...)? It was not clear for me. Also "several data sources" (L101) refers to which? If it's to the products in table 4, I don't think 4 products can be classified as 'several'.

We will clarify this referencing the products listed in Table 1.

11. L114: Here should be mentioned which grid resolution was selected for the ensemble mean.

The resolution used for the ensemble depends on whether the result comprises lat/lon information:

In the case of the time series show in Figure 1. Each product preserves its native resolution, since the time series are computed as spatial averages, each product provides a time series computed over its own native grid. Then, the ensemble averages the time series provided for all products.

In results that comprises lat/lon information (i.e. the ones presented in Figure 2) all products are reprojected over the IBI-REA mesh, as explained in Section 4.

We understand that according to other suggestions (Specific Comments 12 and 17), this paragraph must be rewritten providing all the information regarding the averaging of all products in methods section.

12. L116-119: this should be in the methods section.

This information will be moved to methods. See reply to Specific Comment 11.

13. Analysis of OHC timeseries: I was wondering if instead of only integrating the values from the surface until the reference depth (150, 700 and 2000m), the analysis could benefit from integrating in intervals? From 0-150m, 150-700m, 700-2000m. This way the actual contribution from each layer would be clearer. With always integrating from the surface, the contribution and uncertainties become cumulative, and not independent, so the results from 0-2000m should reflect the behavior from 0-700m, in addition to the contribution of 700-2000m.

One of the main objectives of this paper is to examine the interpretation of results integrated from 0-150, 0-700, and 0-2000. This is because we pursue to analyse the sensitivity of this standardised parameters to its vertical variability. With this, the work only provide information about the IBI region; it also provide results that must be considered when interpreting OHC integrated in these typical layers (even when are obtained outside the IBI region).

14. L123-L127: not only this change in the uncertainties is 'remarkable'. I also found very interesting how the uncertainties are much wider from 99-2002. Could you comment on what could be the cause of that? Would it be related to climate fluctuations, or also to the quality (and quantity) of data?

This is an interesting appreciation; we will discuss this result internally and we will comment it in the text. Our first interpretation is related with the progressive development of the Argo array that started in 2000.

15. L128-L131 & Figure 1: Here is where the results of Figure 1 and the text do not match. The text says the trend of  $0.4 \pm 0.2$  is for the upper 700m, which are in the figure the numbers for the upper 150m. Then it is concluded that "such a trend does not affect the mixing layer. This result suggests a dominance of the variability at intermediate-deep-levels over the OHC trend". Considering the mixing layer is within the upper 150m (as stated in L100, but could actually be reinforced here). If the numbers in Figure 1 are correct, then I would interpret as: the upper 150m have a positive trend; the upper 700m have an insignificant trend,

dominating the variability of OHC, instead of the trend; the overall integrated OHC in the upper 2000m is a positive trend.

We apologise for this mistake, the labelling of panels in Figure 1 is wrong, so the figures in panels A and B are switched. The correct figure is here shown:

This result has been double checked and we can confirm that is correct. Every figure is internally created with its own automatic title, here shown but hidden in Figure 1 in the paper.

Additionally, this result is more consistent showing an increase of uncertainties with the integration depth.

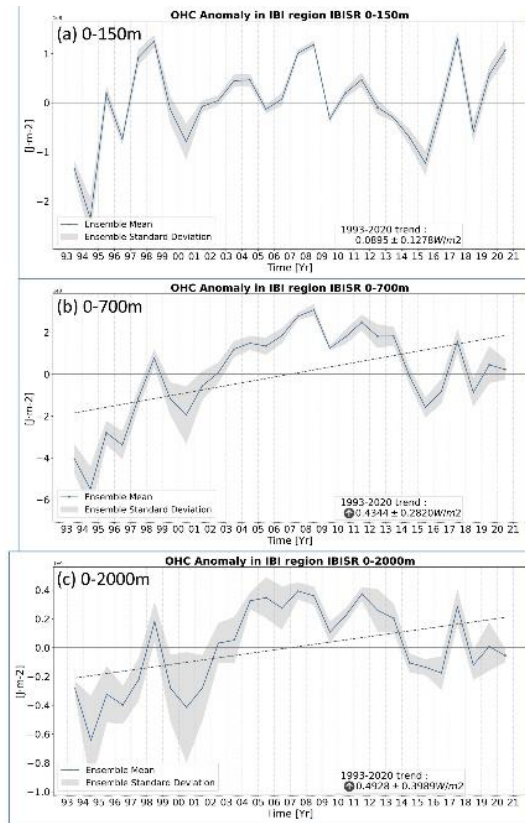

16. L131: “It can be appreciated a change of trend after the year 2006”. What does this mean exactly? Do you mean that if we would analyse trends from 1993-2006, then we would see a negative one and a positive one for 2006-2020? Or do you mean an acceleration in the rate...? Could this be quantified (by a breakpoint analysis for example)?

The change of the observed trends linked to the period considered is one of the main points of discussion of this work. Thus, we propose to make this analysis not only in section 3 but also in sections 4 and 5.

Regarding the section 3, the analysis of trends in Figure 1 will be performed for two periods, the whole time series 1993-2020 and the period 2005-2019. The differences will be consequently discussed in the text.

Additionally, as described in general comments, section 4 will show and discuss the regional trends for the periods 2005-2019 and the period 1993-2020. The different results obtained in these two periods will be discussed in the text. In section 5 we propose to analyse the OHC profiles in two different periods: 1993-2010 and 2010-2018. These two periods are proposed to represent two different behaviours of NAO index (negative trend in the period 1993-2010 and positive trend in the period 2010-2018).

17. L135-138: this should be in the methods section.

This information will be moved to methods. See reply to Specific Comment 11.

18. L138: The IBI-REA grid was used as a reference, which is the one with the higher spatial resolution. This mean that CORA and ARMOR had to be downscaled to match this grid resolution, meaning than that each grid cell is not independent anymore (1 value was split

*into more). Could you comment on effect of this for your analysis? Would your results change if instead of matching IBI-REA resolution, you would match the data set with coarser resolution?*

For this result the OHC is computed from every product using its own grid, trends are then computed over the native grid of the product and finally, OHC trends are interpolated (using bilinear interpolation) to project all results over the same grid. We have not observed mathematical artifacts on this process, so authors do not expect impact on results due to the interpolation.

As the reviewer suggests, every grid point is split into more, but since the OHC is a parameter averaged on surface units, the splitting of data does not have impact because results are divided by the horizontal surface ( $m^2$ ) of the cell.

The use of a coarser resolution grid would lead to a degradation of IBI-REA and GLO-REA results. We consider that this procedure would not have any advantage that would justify such a degradation.

The text will be modified including a deeper explanation of the interpolation procedure done on this step.

**19. L144: what do you mean by “inhomogeneity of uncertainties”?**

We refer to the statistical meaning of the word inhomogeneity, a lack of uniformity. With this expression we refer to the decrease of uncertainties seen after 2003 in time series. This variability of uncertainties is previously explained on section 3 (L123).

The authors understand that this sentence is too summarized and can be interpreted in different ways. To avoid misunderstandings, the sentence will be rewritten including more information.

**20. L148-152: You talk here about some of the divergencies of the ensemble and the OMI product. Might also be worth mentioning that positive trends are seen in the ENS in along the Northwestern European shelf, but this is not seen in the OMI product.**

We thank for this suggestion; we consider it is an interesting result not properly commented in text.

**21. Another thing that caught my eye in Figure 2 is between 30-36°N the trends are not significant for 0-150 and 0-700m, but they are from 0-2000m. Suggesting that the uncertainties become smaller when the deeper layers are added, which seems counterintuitively to me. Or maybe is just an artifact of the intensification of the trends with the deeper layers (as stated in L155)? Could you comment on that?**

This is mainly an artifact that authors associate with the static integration depths. It must be considered that, since the OHC is an integrated variable, results show a summation of all layers weighted by the layer thickness.

We can explain these results observing the T/S diagrams in Figure 3d:

- The layer 0-150 does not show trends, therefore results are not significant.



- The layer 0-700 mixes results from the upper layer (not significant trends), with significant cooling of the underlying levels, and the significant warming of the deepest layers at 600-700m.

Additionally, we should also consider the decrease of interannual variability with depth.

22. L162-L165: *this should be in the methods section.*

After a carefully read, authors do not detect any methods explained in lines 162-165. We understand the reviewer could refer to lines 172-175. This information will be moved to methods. See reply to Specific Comment 11.

23. L175: *It was unclear to me what was meant by ‘yearly basis’. Did you use yearly values for the diagrams? Looking at Figure 3 and the results, I believe you used trends of temperature and salinity for the diagrams... but this was unclear.*

Markers in figure 3b, 3c, and 3d show the spatial average (computed on the corresponding region) of  $\theta$  and S at each vertical level. Since these spatial averages are computed for timeseries in annual basis, a mean value ( $\theta$  and S) is obtained for each depth, and year.

We understand the reviewer’s comment and we will clarify this sentence.

24. Figure 3: *Just a suggestion: since you discuss the water masses, maybe you could actually add boxes in the T/S diagrams indicating where is each water mass? (I had to go back and forth between the definition of the water masses and the figures to know which one was at the surface and which one was the intermediate and the bottom one.*

This suggestion is easy to implement and will make the reading easier.

25. L185: *“a positive trend of temperature entails a positive trend of salinity”. Is it only temperature influencing salinity, or vice-versa?*

There is a correlation between temperature and salinity, thus both variables are linked and variation in one of them are followed by variation in the other one.

26. L198: *you state that the positive trends in LSW could be explained by the connection between the MOV and LSW. But what about box 49N, in which MOW has negative trends? Then the positive trends seen in LSW in that box could not be due to the MOW influence...*

Authors understand the doubts of the reviewer on this sentence. We will elaborate this conclusion, or we will remove it.

27. L209-210 and L218: *these conclusions are wrong if the values in Figure 1 of 0-150m are correct.*

Please, see Specific Comment 15.

28. L220-228: *This is more of results than conclusion. Maybe would fit better in the previous section.*

Since one of the main objectives of OSR is to “provide a comprehensive and state-of-the art assessment of the state of the ocean” we consider the rate of warming/cooling of water masses a relevant result that must be highlighted in the conclusions. However, we understand the suggestion and we accept that all references to previous works fits better as a discussion of results, they will be removed from this section.



### **Technical corrections:**

We thank all corrections, all of them will be included.

- L44: Here is the first time the acronym "IBI" is used in the main text. You should write it out Iberian-Biscay-Ireland the first time it is mentioned.
- L45: Typo: 'info' -> information
- L46: Typo: 'regions closed to coastal areas -> close
- L49: OSRs is mentioned for the first time, without being defined (and appears written out in L91). I suggest just using the expanded version in both places, since the texts already has a lot of acronyms.
- L54 and L63 both define Mediterranean Outflow Water (MOW). An acronym is usually only defined once.
- L57-59: You should either use 'although' or 'nevertheless', but not both in the same sentence. If you keep 'although', then the semi-column after limited should be replace by a period. And in the last part of the sentence "these studies give some..." you can remove "these studies" and change "give" to "giving".
- L80: NAO hasn't been defined. And it actually appears written out in L218. Again, I suggest just using the expanded version in both places, since the texts already has a lot of acronyms.
- L103-105: "Since the objective of this work is the analysis of OHC in the IBI region integrating results from surface down to a maximum of 2000 m depth., This study has included all Copernicus Marine products that provide gridded data of potential temperature with vertical coverage from surface down to at least 2000 m. '
- L146: typo: booth -> both
- L155: It should be 'larger' instead of 'bigger': "the larger the integration depth, the larger is the observed trend".
- L208: "being these indicators useful ..." -> "these indicators are useful ..."
- L210: "Despite the regional analysis ..." -> "While the regional analysis ..."
- L213: end of the line, between OHC and Table 2 be a period and not a comma.
